# Supplementary material for: People with HIV receiving suppressive antiretroviral therapy show typical antibody durability after dual COVID-19 vaccination, and strong third dose responses
Source: PubMed Central journal article supplement (PMC8963693; doi:10.1101/2022.03.22.22272793), 2022-03-23

**Supplemental Table 1: Multivariable analyses of the relationship between sociodemographic, health and vaccine-related variables on immunogenicity measures one and three months following the second vaccine dose**

| Immunogenicity outcome                           | Variable                                 | Time point             |                    |               |                         |                     |                   |
|--------------------------------------------------|------------------------------------------|------------------------|--------------------|---------------|-------------------------|---------------------|-------------------|
|                                                  |                                          | 1 month after 2nd dose |                    |               | 3 months after 2nd dose |                     |                   |
|                                                  |                                          | Estimate               | 95% CI             | p-value       | Estimate                | 95% CI              | p-value           |
| <b>Log<sub>10</sub> anti-RBD Abs<sup>a</sup></b> | HIV infection                            | -0.017                 | -0.18 to 0.14      | 0.83          | -0.13                   | -0.27 to 0.019      | 0.088             |
|                                                  | Age (per year)                           | -0.0057                | -0.0098 to -0.0017 | <b>0.0053</b> | -0.0035                 | -0.0072 to 0.000079 | 0.055             |
|                                                  | Male sex                                 | -0.016                 | -0.16 to 0.13      | 0.82          | 0.028                   | -0.10 to 0.16       | 0.68              |
|                                                  | White ethnicity                          | 0.053                  | -0.078 to 0.18     | 0.43          | 0.048                   | -0.069 to 0.17      | 0.42              |
|                                                  | # Chronic conditions (per additional)    | -0.11                  | -0.19 to -0.030    | <b>0.0072</b> | -0.086                  | -0.16 to -0.012     | <b>0.022</b>      |
|                                                  | Dual ChAdOx1 as initial regimen          | -0.63                  | -0.97 to -0.29     | <b>0.0003</b> | -0.70                   | -1.00 to -0.40      | <b>&lt;0.0001</b> |
|                                                  | Interval btw 1st and 2nd doses (per day) | 0.0036                 | 0.00039 to 0.0069  | <b>0.028</b>  | 0.0037                  | 0.00085 to 0.0066   | <b>0.011</b>      |
|                                                  | Days since second dose                   | -0.0018                | -0.024 to 0.020    | 0.87          | 0.0061                  | -0.010 to 0.022     | 0.46              |
|                                                  | Prior COVID-19                           | 0.063                  | -0.13 to 0.26      | 0.53          | 0.14                    | -0.030 to 0.31      | 0.10              |
| <b>Viral neutralization<sup>b</sup></b>          | HIV infection                            | 0.20                   | -0.47 to 0.86      | 0.56          | -0.063                  | -0.74 to 0.62       | 0.86              |
|                                                  | Age (per year)                           | -0.018                 | -0.030 to -0.0050  | <b>0.0064</b> | -0.012                  | -0.025 to 0.00051   | 0.059             |
|                                                  | Male sex                                 | -0.39                  | -0.84 to 0.055     | 0.086         | -0.12                   | -0.59 to 0.34       | 0.60              |
|                                                  | White ethnicity                          | -0.21                  | -0.61 to 0.18      | 0.29          | -0.19                   | -0.60 to 0.21       | 0.36              |
|                                                  | # Chronic conditions (per additional)    | -0.29                  | -0.53 to -0.041    | <b>0.022</b>  | -0.15                   | -0.41 to 0.10       | 0.23              |
|                                                  | Dual ChAdOx1 as initial regimen          | -1.39                  | -2.41 to -0.37     | <b>0.0077</b> | -1.57                   | -2.60 to -0.53      | <b>0.0032</b>     |
|                                                  | Interval btw 1st and 2nd doses (per day) | 0.0073                 | -0.0038 to 0.018   | 0.2           | 0.00067                 | -0.010 to 0.012     | 0.91              |
|                                                  | Days since second dose                   | -0.0061                | -0.073 to 0.060    | 0.86          | -0.029                  | -0.084 to 0.027     | 0.31              |
|                                                  | EDTA as anticoagulant <sup>c</sup>       | 0.85                   | 0.091 to 1.61      | <b>0.028</b>  | 0.58                    | -0.20 to 1.35       | 0.14              |
| Prior COVID-19                                   | 1.15                                     | 0.56 to 1.75           | <b>0.0002</b>      | 1.65          | 1.06 to 2.24            | <b>&lt;0.0001</b>   |                   |

<sup>a</sup>quantified using the Roche Elecsys anti-S assay

<sup>b</sup>for viral neutralization, reciprocal plasma dilutions were log<sub>2</sub> transformed prior to multivariable analysis.

<sup>c</sup>Neutralization assays were performed using plasma, so the analysis also corrects for the anticoagulant used, with ACD as the reference category.

Analyses of anti-RBD concentration do not correct for this variable because this assay was performed on serum collected in the same tube type.

**Supplemental Table 2: Multivariable analyses of the relationship between sociodemographic, health and vaccine-related variables and detectable viral neutralization activity six months following the second vaccine dose**

| <b>Immunogenicity outcome</b>                                     | <b>Variable</b>                          | <b>Odds Ratio</b> | <b>95% CI</b>  | <b>p-value</b> |
|-------------------------------------------------------------------|------------------------------------------|-------------------|----------------|----------------|
| <b>Detectable viral neut. 6 months after 2nd dose<sup>a</sup></b> | HIV infection                            | 0.51              | 0.12 to 1.77   | 0.32           |
|                                                                   | Age (per year)                           | 0.98              | 0.96 to 1.01   | 0.22           |
|                                                                   | Male sex                                 | 0.68              | 0.29 to 1.50   | 0.35           |
|                                                                   | White ethnicity                          | 0.88              | 0.44 to 1.78   | 0.73           |
|                                                                   | # Chronic conditions (per additional)    | 1.00              | 0.61 to 1.63   | 1.00           |
|                                                                   | Dual ChAdOx1 as initial regimen          | 0.19              | 0.0079 to 2.36 | 0.21           |
|                                                                   | Interval btw 1st and 2nd doses (per day) | 1.01              | 0.99 to 1.03   | 0.14           |
|                                                                   | Days since second dose                   | 1.03              | 0.98 to 1.09   | 0.24           |
|                                                                   | EDTA as anticoagulant <sup>b</sup>       | 9.31              | 2.41 to 44.62  | <b>0.0023</b>  |
|                                                                   | Prior COVID-19                           | 4.57              | 1.74 to 13.99  | <b>0.0037</b>  |

<sup>a</sup> Results are presented as the adjusted Odds Ratios and 95% CI of detectable viral neutralization activity at this time point, calculated using multivariable logistic regression.

<sup>b</sup> Neutralization assays were performed using plasma, so the analysis also corrects for the anticoagulant used, with ACD as the reference category.

**Supplemental Table 3: Multivariable analysis of the relationship between sociodemographic, health and vaccine-related variables and viral neutralization activity one month following the third vaccine dose**

| <b>Immunogenicity outcome</b>                                        | <b>Variable</b>                              | <b>Estimate</b> | <b>95% CI</b>     | <b>p-value</b> |
|----------------------------------------------------------------------|----------------------------------------------|-----------------|-------------------|----------------|
| <b>Viral neut. (log<sub>2</sub>) 1 mo after 3rd dose<sup>a</sup></b> | HIV infection                                | 0.58            | -0.22 to 1.37     | 0.15           |
|                                                                      | Age (per year)                               | -0.00068        | -0.017 to 0.016   | 0.94           |
|                                                                      | Male sex                                     | -0.047          | -0.61 to 0.51     | 0.87           |
|                                                                      | White ethnicity                              | -0.27           | -0.74 to 0.20     | 0.27           |
|                                                                      | # Chronic conditions (per additional)        | -0.067          | -0.35 to 0.21     | 0.64           |
|                                                                      | Dual ChAdOx1 as initial regimen              | 0.96            | -0.18 to 2.10     | 0.099          |
|                                                                      | mRNA-1273 as third dose (vs. BNT162b2)       | 0.78            | 0.32 to 1.23      | <b>0.0009</b>  |
|                                                                      | Interval between 1st and 2nd doses (per day) | -0.00095        | -0.015 to 0.013   | 0.89           |
|                                                                      | Interval between 2nd and 3rd doses (per day) | 0.0016          | -0.0066 to 0.0097 | 0.71           |
|                                                                      | Days since 3rd dose (per day)                | -0.016          | -0.065 to 0.034   | 0.53           |
|                                                                      | EDTA as anticoagulant <sup>b</sup>           | 0.28            | -0.68 to 1.25     | 0.56           |
|                                                                      | Prior COVID-19                               | 0.98            | 0.39 to 1.57      | <b>0.0013</b>  |

<sup>a</sup>for viral neutralization, reciprocal plasma dilutions were log<sub>2</sub> transformed prior to multivariable analysis.

<sup>b</sup>Neutralization assays were performed using plasma, so the analysis also corrects for the anticoagulant used, with ACD as the reference category.

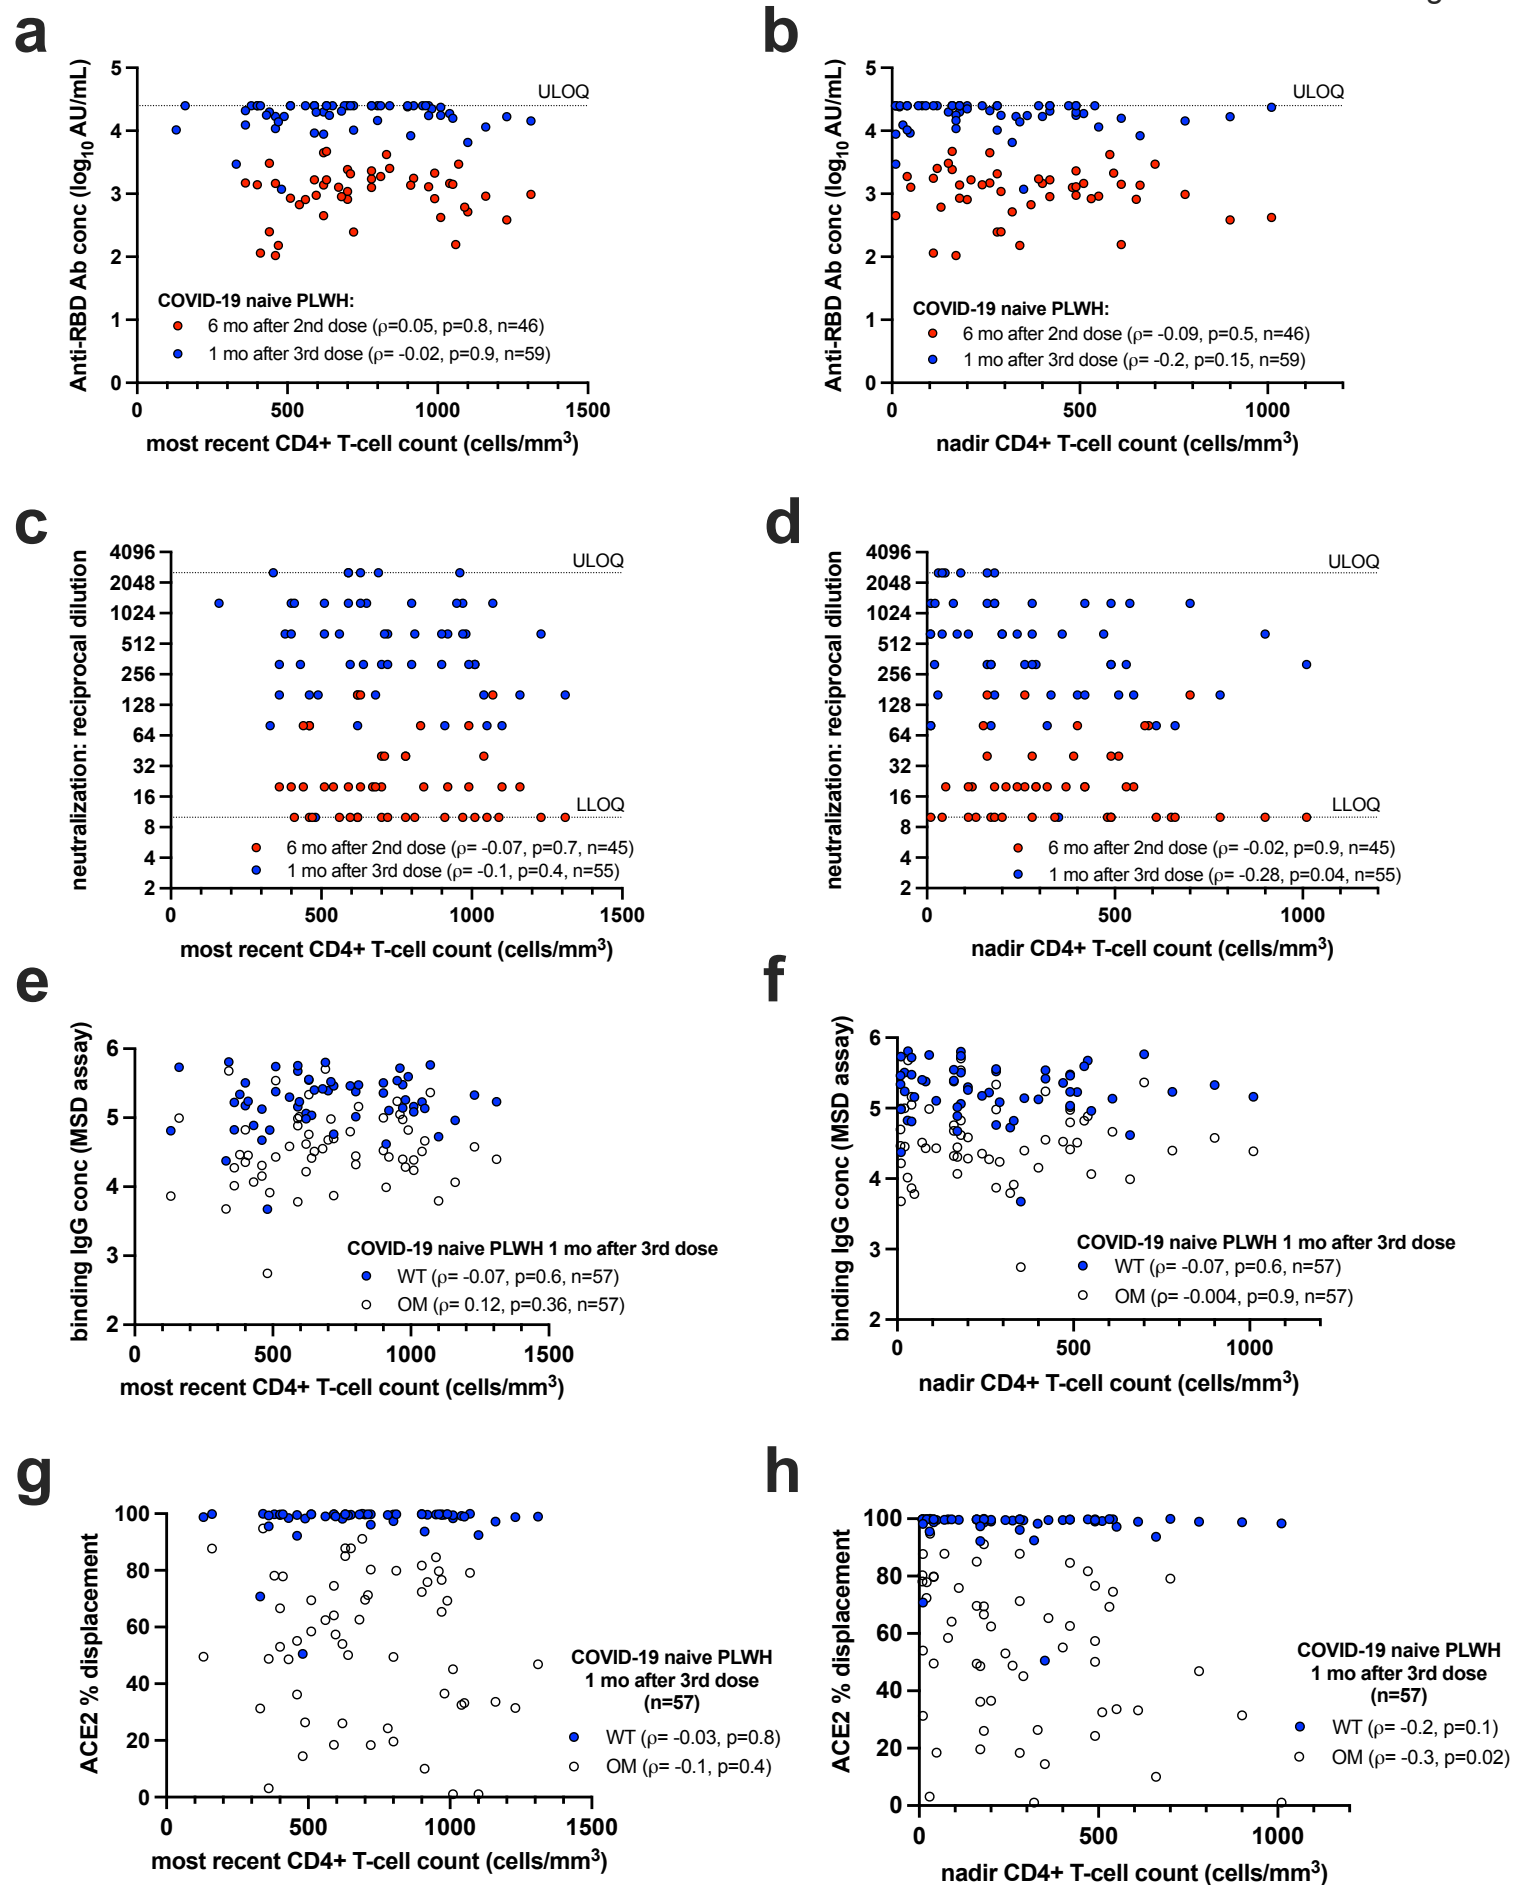

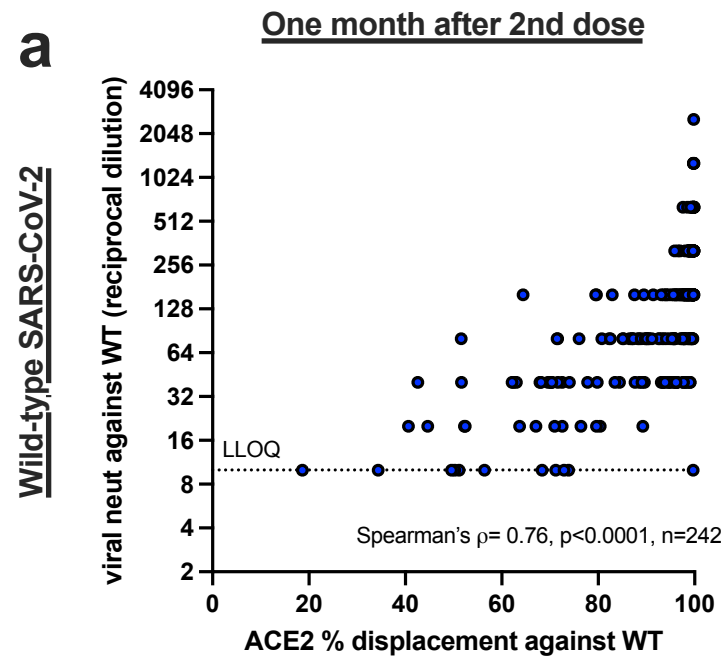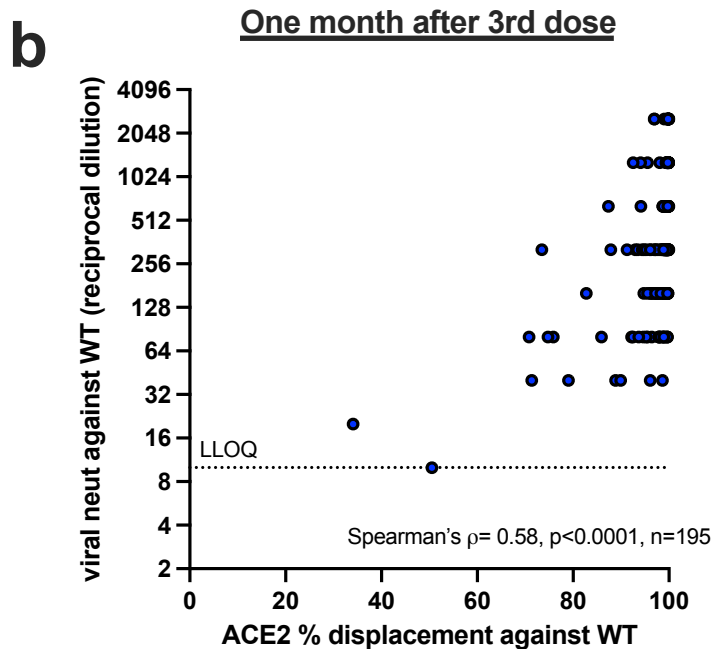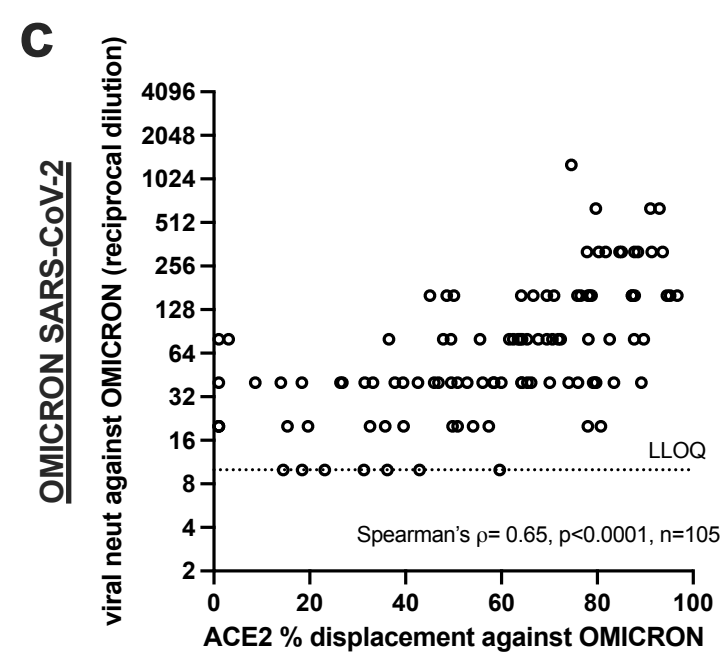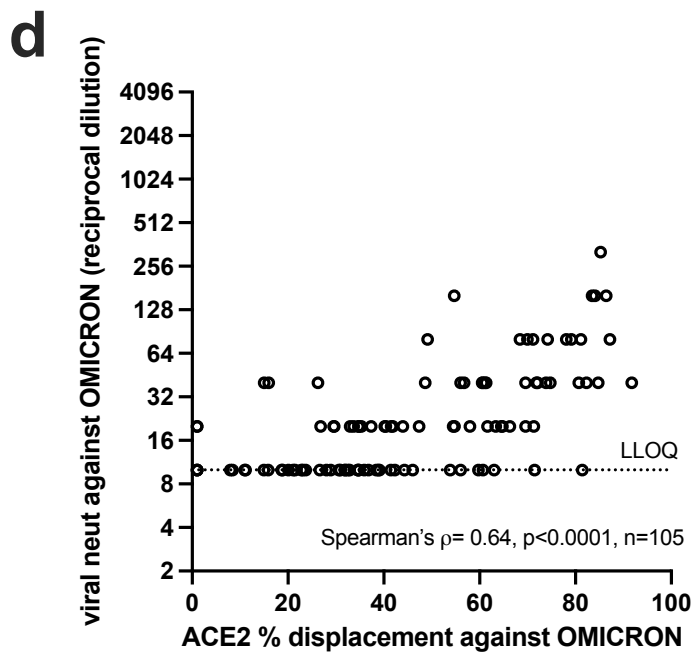

Supplement: NIHPP2022.03.22.22272793V1-supplement-1.pdf [file NIHPP2022.03.22.22272793V1-supplement-1.pdf]
